# Supplementary material for: Risk factors for lymphatic filariasis and mass drug administration non-participation in Mandalay Region, Myanmar
Source: PubMed Central journal article supplement (PMC7821648; doi:10.1186/s13071-021-04583-y), 2021-01-22
Supplement: 13071_2021_4583_MOESM1_ESM.pdf [file 13071_2021_4583_MOESM1_ESM.pdf]

|        |               |          |         |         |        |
|--------|---------------|----------|---------|---------|--------|
| နေ့စွဲ | နာမည်<br>အတို | မြို့နယ် | ကျေးရွာ | အိမ်ခြေ | လူဦးရေ |
|        |               |          |         |         |        |

**Additional File 1: Individual Survey**

**SURVEY COMPONENT**

|                     |                  |   |                                       |     |   |  |  |
|---------------------|------------------|---|---------------------------------------|-----|---|--|--|
| <i>Demographics</i> |                  |   |                                       |     |   |  |  |
| Occupation          | None             | 1 | Lived in this village for whole life? | No  | 0 |  |  |
|                     | Student          | 2 |                                       | Yes | 1 |  |  |
|                     | Manual Work      | 3 |                                       |     |   |  |  |
|                     | Farmer/Fisherman | 4 |                                       |     |   |  |  |
|                     | Civil Worker     | 5 |                                       |     |   |  |  |
|                     | Home Duties      | 6 |                                       |     |   |  |  |
|                     | Other: _____     | 8 |                                       |     |   |  |  |
|                     |                  |   |                                       |     |   |  |  |
| Work Location       | Indoor           | 1 | If no, how many years?                |     |   |  |  |
|                     | Outdoor          | 2 |                                       |     |   |  |  |
|                     | Mixed            | 3 |                                       |     |   |  |  |

|                                                 |     |   |                                      |                 |   |  |  |
|-------------------------------------------------|-----|---|--------------------------------------|-----------------|---|--|--|
| <i>Infection/Personal risk factors</i>          |     |   |                                      |                 |   |  |  |
| Slept under a bed net last night?               | No  | 0 | How often do you wear shoes outside? | Never           | 0 |  |  |
|                                                 | Yes | 1 |                                      | Rarely          | 1 |  |  |
|                                                 |     |   |                                      | Sometimes       | 2 |  |  |
|                                                 |     |   |                                      | Most of the day | 3 |  |  |
|                                                 |     |   |                                      | Always          | 4 |  |  |
| How many times do you bathe with soap per week? |     |   | Wearing Shoes now?                   | No              | 0 |  |  |
|                                                 |     |   |                                      | Yes             | 1 |  |  |

|                                                                 |                |   |                                                                                                                                                                                                 |                |   |  |  |
|-----------------------------------------------------------------|----------------|---|-------------------------------------------------------------------------------------------------------------------------------------------------------------------------------------------------|----------------|---|--|--|
| <i>Infection/symptoms and morbidity</i>                         |                |   |                                                                                                                                                                                                 |                |   |  |  |
| Have you ever been told you have LF?                            | No             | 0 | Have you ever had treatment for LF?                                                                                                                                                             | No (skip to #) | 0 |  |  |
|                                                                 | Yes            | 1 |                                                                                                                                                                                                 | Yes            | 1 |  |  |
| If Yes, at what age?                                            |                |   | If yes, what kind of treatment                                                                                                                                                                  | Tablets        | 1 |  |  |
|                                                                 |                |   |                                                                                                                                                                                                 | Surgery        | 2 |  |  |
|                                                                 |                |   |                                                                                                                                                                                                 | Other          | 8 |  |  |
| Have you ever noticed swelling of the limbs, breast or scrotum? | No (skip to #) | 0 | Have you had an episode of dermatolymphangioadenitis (Sudden onset local tenderness and redness of the skin, red streaks along the leg and enlarged inguinal lymph nodes) in the last 6 months? | No (skip to #) | 0 |  |  |
|                                                                 | Yes            | 1 |                                                                                                                                                                                                 | Yes            | 1 |  |  |
| If Yes, what symptoms?                                          |                |   | If yes, how many times in last 6 months?                                                                                                                                                        |                |   |  |  |
|                                                                 |                |   |                                                                                                                                                                                                 |                |   |  |  |

|                                                                                    |     |   |                                         |     |   |  |  |
|------------------------------------------------------------------------------------|-----|---|-----------------------------------------|-----|---|--|--|
| <i>MDA Participation</i>                                                           |     |   |                                         |     |   |  |  |
| Have you ever taken the medication for LF in a mass drug administration programme? | No  | 0 | Did you have any side effects?          | No  | 0 |  |  |
|                                                                                    | Yes | 1 |                                         | Yes | 1 |  |  |
| If yes, did you take the medication last year?                                     | No  | 0 | If yes, what where they?                |     |   |  |  |
|                                                                                    | Yes | 1 |                                         |     |   |  |  |
| If yes, how many times had you take medication total?                              |     |   | Have you ever been not eligible for MDA | No  | 0 |  |  |
|                                                                                    |     |   |                                         | Yes | 1 |  |  |
|                                                                                    |     |   | If Yes, why?                            |     |   |  |  |

|        |               |          |         |         |        |
|--------|---------------|----------|---------|---------|--------|
| နေ့စွဲ | နာမည်<br>အတို | မြို့နယ် | ကျေးရွာ | အိမ်ခြေ | လူဦးရေ |
|        |               |          |         |         |        |

**MORBIDITY COMPONENT**

**1. Lymphadenitis & Lymphangitis**

|                                                                                                                |     |   |
|----------------------------------------------------------------------------------------------------------------|-----|---|
| Lymphadenitis Present?                                                                                         | No  | 0 |
|                                                                                                                | Yes | 1 |
| If Yes, details<br><i>Side: (Right/Left), Area: (Axilla/Inguinal)</i><br><i>Symptoms: (Redness/Tenderness)</i> |     |   |
| Lymphangitis (red streaks) Present?                                                                            | No  | 0 |
|                                                                                                                | Yes | 1 |
| If Yes, details<br><i>Location</i><br><i>Symptoms: (Redness/Tenderness)</i>                                    |     |   |

**2. Lymphoedema & Limb Elephantiasis**

| <i>Clinical Signs</i>                                                                    |                                                                  | R Arm | L Arm | R Leg | L Leg |
|------------------------------------------------------------------------------------------|------------------------------------------------------------------|-------|-------|-------|-------|
| Limb Circumference ( <i>6cm from the wrist; 10cm proximal to the lateral malleolus</i> ) |                                                                  |       |       |       |       |
| Lymphoedema Present?                                                                     | No                                                               | 0     | 0     | 0     | 0     |
|                                                                                          | Yes                                                              | 1     | 1     | 1     | 1     |
| If yes, Oedema Type                                                                      | Pitting                                                          | 0     | 0     | 0     | 0     |
|                                                                                          | Non-Pitting                                                      | 1     | 1     | 1     | 1     |
| Stemmer Sign Positive                                                                    | No                                                               | 0     | 0     | 0     | 0     |
|                                                                                          | Yes                                                              | 1     | 1     | 1     | 1     |
| If Lymphoedema, what stage?                                                              | Lymphoedema (pitting) reversible overnight                       | 1     | 1     | 1     | 1     |
|                                                                                          | Irreversible (non-pitting) lymphoedema + normal skin             | 2     | 2     | 2     | 2     |
|                                                                                          | Stage 2 + thick skin and shallow folds with visible base         | 3     | 3     | 3     | 3     |
|                                                                                          | Stage 2 + knobs (bumps and lumps)                                | 4     | 4     | 4     | 4     |
|                                                                                          | Stage 2 + deep folds with base visible when separated by finger; | 5     | 5     | 5     | 5     |
|                                                                                          | Irreversible lymphoedema with mossy foot                         | 6     | 6     | 6     | 6     |
|                                                                                          | Stage 2 + disability to do routine activities adequately.        | 7     | 7     | 7     | 7     |
| Other Details                                                                            |                                                                  |       |       |       |       |

**3. Hydrocoele and Scrotal Elephantiasis**

|                      |                                                                | Right Testicle | Left Testicle |
|----------------------|----------------------------------------------------------------|----------------|---------------|
| Hydrocoele           | No                                                             | 0              | 0             |
|                      | Yes                                                            | 1              | 1             |
| If Yes, Stage        | Normal                                                         | 0              | 0             |
|                      | Scrotum size < tennis ball vertically                          | 1              | 1             |
|                      | Scrotum size > tennis ball, lower pole doesn't reach mid-thigh | 2              | 2             |
|                      | Lower pole reaches below mid-thigh but above superior patella  | 3              | 3             |
|                      | Lower pole between superior patella and tibial tuberosity      | 4              | 4             |
|                      | Lower pole between tibial tuberosity and mid-leg               | 5              | 5             |
|                      | Lower pole below the mid-leg                                   | 6              | 6             |
| If Yes, Penis Burial | Normal                                                         | 0              | 0             |
|                      | Partial burial, >2cm visible                                   | 1              | 1             |
|                      | Partial burial, <2cm visible                                   | 2              | 2             |
|                      | Only prepuce/glans visible                                     | 3              | 3             |
|                      | Complete burial                                                | 4              | 4             |
| Diameter on USG      |                                                                |                |               |
| Other details        |                                                                |                |               |

|        |               |          |         |         |        |
|--------|---------------|----------|---------|---------|--------|
| နေ့စွဲ | နာမည်<br>အတို | မြို့နယ် | ကျေးရွာ | အိမ်ခြေ | လူဦးရေ |
|        |               |          |         |         |        |

**တစ်ဦးချင်းစီ မေးရန်**

**SURVEY COMPONENT**

| Demographics |                             |                                                                                                                    |                                 |        |                                                                        |             |        |
|--------------|-----------------------------|--------------------------------------------------------------------------------------------------------------------|---------------------------------|--------|------------------------------------------------------------------------|-------------|--------|
| ၅<br>၀       | အလုပ်အကိုင်<br>(Occupation) | အလုပ်မရှိ<br>ကျောင်းသား<br>အလုပ်သမား<br>လယ်သမား၊ ရေလုပ်သား<br>ဝန်ထမ်း Civil Worker<br>အိမ်မှုကိစ္စ<br>အခြား: _____ | ၁<br>၂<br>၃<br>၄<br>၅<br>၆<br>၈ | ၅<br>၂ | ဒီရွာမှာပဲမွေးကတည်းကနေတာလား<br>(Lived in this village for whole life?) | မရှိ<br>ရှိ | ၀<br>၁ |
| ၅<br>၁       | အလုပ်အနေအ<br>ထား/ နေရာ      | အိမ်တွင်း<br>အိမ်ပြင်<br>အိမ်တွင်း/အိမ်ပြင်                                                                        | ၁<br>၂<br>၃                     | ၅<br>၃ | မဟုတ်ပါက ဒီမှာနေတာဘယ်လောက်ကြာပြီလဲ<br>(If no, how many years?)         |             |        |

| Infection/Personal risk factors |                                                                                               |             |        |    |                                                                                       |                                                                         |                       |
|---------------------------------|-----------------------------------------------------------------------------------------------|-------------|--------|----|---------------------------------------------------------------------------------------|-------------------------------------------------------------------------|-----------------------|
| ၅၄                              | လွန်ခဲ့သောညက ခြင်ထောင်ဖြင့်<br>အိပ်ခဲ့ခြင်း ရှိမရှိ<br>(Slept under a bed net last<br>night?) | မရှိ<br>ရှိ | ၀<br>၁ | ၅၆ | မကြာခဏအပြင်ထွက်တိုင်း<br>ဖိနပ်စီးရဲ့လား။ (How often<br>do you wear shoes<br>outside?) | မစီးပါ<br>တစ်ခါတစ်ရံ<br>နေ့တစ်ချို့<br>နေ့တော်တော်များများ<br>နေ့တိုင်း | ၀<br>၁<br>၂<br>၃<br>၄ |
| ၅၅                              | တစ်ပတ်မှာ ဘယ်နှစ်ရက်<br>ဆပ်ပြာနဲ့ရေချိုးသလဲ (Bathe Freq.?)                                    |             |        | ၅၇ | အခုလောလောဆယ် ဖိနပ်စီးထားလား (Shoes?)                                                  | မရှိ<br>ရှိ                                                             | ၀<br>၁                |

| Infection/symptoms and morbidity မေးခွန်း (၅၈)တွင် မရှိပါက မေးခွန်း (၆၇)သို့ သွားပါ။ |                                                                                                               |             |        |    |                                                                                                                                                                              |                                  |             |
|--------------------------------------------------------------------------------------|---------------------------------------------------------------------------------------------------------------|-------------|--------|----|------------------------------------------------------------------------------------------------------------------------------------------------------------------------------|----------------------------------|-------------|
| ၅၈                                                                                   | ဆင်ခြေထောက်ရောဂါ ရှိကြောင်း<br>အသိပေးခံရဖူးပါသလား<br>(Told you have LF?)                                      | မရှိ<br>ရှိ | ၀<br>၁ | ၆၃ | ဆင်ခြေထောက်ရောဂါအတွက်<br>ဆေးကုသမှု ခံယူဖူးပါသလား<br>(Treatment for LF?)                                                                                                      | မရှိ<br>ရှိ                      | ၀<br>၁      |
| ၅၉                                                                                   | ရှိခဲ့လျှင် မည်သည့်အရွယ်က<br>ဖြစ်ခဲ့သလဲ (At what age?)                                                        |             |        | ၆၄ | ရှိခဲ့လျှင်၊ မည်သည့်ကုသမှုမျိုး<br>ရရှိခဲ့ပါသလဲ (Type of Treatment)                                                                                                          | ဆေးပြားသောက်<br>ခွဲစိတ်<br>အခြား | ၀<br>၁<br>၈ |
| ၆၀                                                                                   | သင်၏ ခြေလက်၊ ရင်သား၊<br>ကပ်ပယ်အိတ်များတွင်<br>ယောင်ယမ်းခြင်း ရှိခဲ့ခြင်းကို<br>သတိပြုမိခဲ့ပါလား (LF Symptoms) | မရှိ<br>ရှိ | ၀<br>၁ | ၆၅ | လွန်ခဲ့သော ၆ လအတွင်း အရေပြားနာကျင်ခြင်း၊<br>နီရဲခြင်း၊ ခြေထောက်တွင် အနီစင်းများပေါ်ခြင်း၊<br>ပေါင်ခြံတွင် အကျိတ်များ ရုတ်တရက်ပေါ်ခြင်း<br>ရှိခဲ့ဖူးပါသလား (Episodes of ADLA) | မရှိ<br>ရှိ                      | ၀<br>၁      |
| ၆၁                                                                                   | တကယ်လို့<br>ရောဂါရှိနေဖြစ်နေချိန်ရော                                                                          |             |        |    |                                                                                                                                                                              |                                  |             |
| ၆၂                                                                                   | ရှိခဲ့လျှင် မည်သည့်အရွယ်က<br>ဖြစ်ခဲ့သလဲ                                                                       |             |        | ၆၆ | ရှိခဲ့လျှင် ပြီးခဲ့သည့် ၆လအတွင်း အကြိမ်မည်မျှ<br>ဖြစ်ခဲ့ပါသလဲ (Freq.)                                                                                                        |                                  |             |

| MDA Participation |                                                                               |             |        |    |                                                             |             |        |
|-------------------|-------------------------------------------------------------------------------|-------------|--------|----|-------------------------------------------------------------|-------------|--------|
| ၆၇                | ဆင်ခြေထောက်ရောဂါအတွက်<br>လူအားလုံးဆေးတိုက်ကျွေးခြင်းတွင်<br>ဆေးသောက်ဖူးပါသလား | မရှိ<br>ရှိ | ၀<br>၁ | ၇၀ | ဆေး၏ ဘေးထွက်ဆိုးကျိုးများ ခံစားဖူးပါသလား<br>(side effects?) | မရှိ<br>ရှိ | ၀<br>၁ |
| ၆၈                | ပြီးခဲ့တဲ့နှစ်က ဆင်ခြေထောက်ကာကွယ်<br>ဆေးသောက်ခဲ့သလား                          | မရှိ<br>ရှိ | ၀<br>၁ | ၇၁ | ခံစားရတယ်ဆိုရင်ဆိုးကျိုးတွေက ဘာတွေလဲ ၊                      |             |        |
|                   |                                                                               |             |        | ၇၂ | ဆေးသောက်ရန် မသင့်တော်ဘူးလို့<br>သတ်မှတ်ခံရဖူးပါသလား         | မရှိ<br>ရှိ | ၀<br>၁ |
| ၆၉                | သောက်ခဲ့တယ်ဆိုရင် စုစုပေါင်း<br>ဘယ်နှစ်ကြိမ် သောက်ခဲ့သလဲ။                     |             |        | ၇၃ | ဘာကြောင့်ကြောင့် မသောက်ရတာလဲ<br>၊ (If not, why?)            |             |        |

|        |               |          |         |         |        |
|--------|---------------|----------|---------|---------|--------|
| နေ့စွဲ | နာမည်<br>အတို | မြို့နယ် | ကျေးရွာ | အိမ်ခြေ | လူဦးရေ |
|        |               |          |         |         |        |

**MORBIDITY COMPONENT**

ပြန် ရည် / သားငန် ရည် ကျိတ်၊ ပြန် ရည် / သားငန် ရည် ကြောရောင် ရမ်းမှု

|    |                                                                                                     |       |       |
|----|-----------------------------------------------------------------------------------------------------|-------|-------|
| ၇၄ | Lymphadenitis Present?                                                                              | မရှိ  | ဝ     |
| ၇၅ | If Yes, details<br>Side: (Right/Left), Area:<br>(Axilla/Inguinal)<br>Symptoms: (Redness/Tenderness) | ယာဘက် | ဝဲဘက် |
| ၇၆ | Lymphangitis (red streaks) Present?                                                                 | မရှိ  | ဝ     |
| ၇၇ | If Yes, details<br>Location, Symptoms (Redness/<br>Tenderness)                                      |       |       |

ဆင်ခြေထောက်နှင့် ခြေ/လက်ကြီးမှု

| Clinical Signs |                                                                        | ယာဘက်<br>လက်                                              | ဝဲဘက်<br>လက် | ယာဘက်<br>ခြေထောက်                        | ဝဲဘက်<br>ခြေထောက် |
|----------------|------------------------------------------------------------------------|-----------------------------------------------------------|--------------|------------------------------------------|-------------------|
| ၇၈             | Limb လုံးပတ် (6cm from wrist; 10cm from lateral malleolus) (စင်တီမီတာ) |                                                           |              |                                          |                   |
| ၇၉             | ခြေ/လက်ရောင်ရမ်းမှု ?<br>(Limb oedema present?)                        | မရှိ                                                      | ဝ            | မရှိ                                     | ဝ                 |
| ၈၀             | ရိုးခွဲလျှင် ရောင်ရမ်းမှု အဆင့်<br>(Oedema Type)                       | Pitting                                                   | ဝ            | Non-Pitting                              | ဝ                 |
| ၈၁             | Stemmer Sign Positive                                                  | မရှိ                                                      | ဝ            | မရှိ                                     | ဝ                 |
| ၈၂             | လက်ရောင်ရမ်းမှု<br>အဆင့်သတ်မှတ်မှု<br>(Stages)                         | Lymphoedema reversible overnight                          | ၁            | Irreversible lymphoedema + normal skin   | ၂                 |
|                |                                                                        | Stage 2 + thick skin and shallow folds with visible base  | ၃            | Stage 2 + knobs (bumps and lumps)        | ၄                 |
|                |                                                                        | Stage 2 + deep folds with base seen separated by finger;  | ၅            | Irreversible lymphoedema with mossy foot | ၆                 |
|                |                                                                        | Stage 2 + disability to do routine activities adequately. | ၇            |                                          | ၈                 |
| ၈၃             | အသေးစိတ်ဖော်ပြမှု (Details)                                            |                                                           |              |                                          |                   |

ရေမုတ္တန်နှင့် ကပ်ပယ်အိတ်ရောင်ရမ်းမှု

|    |                                                      | ကပ်ပယ်အိတ်<br>ယာဘက်                                            | ကပ်ပယ်အိတ်<br>ဝဲဘက် |
|----|------------------------------------------------------|----------------------------------------------------------------|---------------------|
| ၈၄ | ရေမုတ္တန်<br>(Stage)                                 | မရှိ                                                           | ဝ                   |
| ၈၅ | If Yes, Stage                                        | ၁                                                              | ၁                   |
| ၈၆ | If Yes, Penis Burial                                 | Normal                                                         | ဝ                   |
|    |                                                      | Scrotum size < tennis ball vertically                          | ၁                   |
|    |                                                      | Scrotum size > tennis ball, lower pole doesn't reach mid-thigh | ၂                   |
|    |                                                      | Lower pole reaches below mid-thigh but above superior patella  | ၃                   |
|    |                                                      | Lower pole between superior patella and tibial tuberosity      | ၄                   |
|    |                                                      | Lower pole between tibial tuberosity and mid-leg               | ၅                   |
|    |                                                      | Lower pole below the mid-leg                                   | ၆                   |
| ၈၇ | If Yes, Penis Burial                                 | Normal                                                         | ဝ                   |
|    |                                                      | Partial burial, >2cm visible                                   | ၁                   |
|    |                                                      | Partial burial, <2cm visible                                   | ၂                   |
|    |                                                      | Only prepuce/glans visible                                     | ၃                   |
|    |                                                      | Complete burial                                                | ၄                   |
| ၈၈ | USG တွင်တွေ့ရသောအရွယ်အစား (စင်တီမီတာ) (USS Diameter) |                                                                |                     |
| ၈၉ | အသေးစိတ်ဖော်ပြမှု (Details)                          |                                                                |                     |

| နေ့စွဲ |  | နာမည်<br>အတို |  | မြို့နယ် | ကျေးရွာ |  | အိမ်ခြေ |  | လူဦးရေ |  |
|--------|--|---------------|--|----------|---------|--|---------|--|--------|--|
|        |  |               |  |          |         |  |         |  |        |  |
|        |  |               |  |          |         |  |         |  |        |  |
