# Supplementary material for: Risk factors for lymphatic filariasis and mass drug administration non-participation in Mandalay Region, Myanmar
Source: PubMed Central journal article supplement (PMC7821648; doi:10.1186/s13071-021-04583-y), 2021-01-22
Supplement: 13071_2021_4583_MOESM2_ESM.pdf [file 13071_2021_4583_MOESM2_ESM.pdf]

## Additional File 2: Household Survey

### A: HOUSEHOLD IDENTIFICATION

|                               |                            |                |                              |                            |
|-------------------------------|----------------------------|----------------|------------------------------|----------------------------|
| <b>Date (dd/mm/yyyy)</b>      |                            |                |                              |                            |
| <b>Interviewer (initials)</b> |                            |                |                              |                            |
|                               | <i>Township</i>            | <i>Village</i> | <i>Household Number</i>      | <i>Household Head Name</i> |
| <b>Household Details</b>      |                            |                |                              |                            |
| <b>Household Code</b>         |                            |                |                              |                            |
|                               | <i>Latitude (00.00000)</i> |                | <i>Longitude (000.00000)</i> |                            |
| <b>Household Location</b>     |                            |                | <i>Elevation (0000m)</i>     |                            |
|                               | <i>Date (dd/mm/yyyy)</i>   |                | <i>Result Code</i>           |                            |
| <b>Visit 1</b>                |                            |                |                              |                            |
| <b>Visit 2</b>                |                            |                |                              |                            |

**Result Codes: 1= Completed, 2= Not Home, 3= Vacated, 4= Postponed, 5= Refused, 6=Other**

### B: HOUSEHOLD ENROLLMENT

| <b>Total Persons in Household</b> |                 |                    |           |            |            |                       |                                     |  |
|-----------------------------------|-----------------|--------------------|-----------|------------|------------|-----------------------|-------------------------------------|--|
| <b>Respondent (Tick)</b>          | <b>Initials</b> | <b>Age (years)</b> | <b>1+</b> | <b>15+</b> | <b>Sex</b> | <b>Present (tick)</b> | <b>Slept Here Last Night (tick)</b> |  |
|                                   | 1               |                    |           |            |            |                       |                                     |  |
|                                   | 2               |                    |           |            |            |                       |                                     |  |
|                                   | 3               |                    |           |            |            |                       |                                     |  |
|                                   | 4               |                    |           |            |            |                       |                                     |  |
|                                   | 5               |                    |           |            |            |                       |                                     |  |
|                                   | 6               |                    |           |            |            |                       |                                     |  |
|                                   | 7               |                    |           |            |            |                       |                                     |  |
|                                   | 8               |                    |           |            |            |                       |                                     |  |
|                                   | 9               |                    |           |            |            |                       |                                     |  |
|                                   | 10              |                    |           |            |            |                       |                                     |  |

|        |  |          |         |         |
|--------|--|----------|---------|---------|
| နေ့စွဲ |  | မြို့နယ် | ကျေးရွာ | အိမ်ခြေ |
|        |  |          |         |         |

ကျေးဇူးပြုပြီး မေးခွန်းလေးတွေမသိဘူးဆိုရင် “ ၉ ” လို့ရေးပေးပါ။

**C: HOUSEHOLD QUESTIONNAIRE**

| Demographics |                          |                                                              |                  |   |                                |                                          |                  |
|--------------|--------------------------|--------------------------------------------------------------|------------------|---|--------------------------------|------------------------------------------|------------------|
| 1            | Ethnicity                | Bamar<br>Other: _____                                        | 1<br>8           | 4 | Respondent Schooling           | None<br>Primary<br>Secondary<br>Tertiary | 1<br>2<br>3<br>4 |
| 2            | Religion                 | Buddhist<br>Other: _____                                     | 1<br>8           | 5 | Highest Schooling in Household | None<br>Primary<br>Secondary<br>Tertiary | 1<br>2<br>3<br>4 |
| 3            | Literacy (show sentence) | None<br>Part of Sentence<br>Whole Sentence<br>Other Language | 1<br>2<br>3<br>8 | 6 | Monthly Income of household    |                                          |                  |

| Physical Household Details |                               |                                                                       |                  |    |                                  |                                                        |                  |
|----------------------------|-------------------------------|-----------------------------------------------------------------------|------------------|----|----------------------------------|--------------------------------------------------------|------------------|
| 7                          | Roof Material                 | Thatch<br>Metal<br>Tiles<br>Other: _____                              | 1<br>2<br>3<br>8 | 11 | Screens/ Glass on most windows   | No<br>Yes                                              | 0<br>1           |
| 8                          | Wall Material                 | Rattan / Natural<br>Wood<br>Bricks/Cement<br>Other _____              | 1<br>2<br>3<br>8 | 12 | Number of bed-nets in the house? |                                                        |                  |
| 9                          | Floor Material                | Natural<br>Wood Planks<br>Tiles, Cement, Polished Wood<br>Other _____ | 1<br>2<br>3<br>8 | 13 | Toilet Type                      | Open-defecation<br>Unimproved<br>Shared<br>Improved    | 1<br>2<br>3<br>4 |
| 10                         | Number of rooms in the house? |                                                                       |                  | 14 | Water Type                       | Surface<br>Unimproved<br>Other Improved<br>Piped Water | 1<br>2<br>3<br>4 |

ကျောင်းနေအရွယ် ကလေးတိုင်း ကျောင်းသွားရမယ်။

|        |  |          |         |         |
|--------|--|----------|---------|---------|
| နေ့စွဲ |  | မြို့နယ် | ကျေးရွာ | အိမ်ခြေ |
|        |  |          |         |         |

ကျေးဇူးပြုပြီး မေးခွန်းလေးတွေမသိဘူးဆိုရင် “ ၉ ” လို့ရေးပေးပါ။

| <i>Principal Components Analysis Asset register</i> |                      |     |   |    |                   |     |   |
|-----------------------------------------------------|----------------------|-----|---|----|-------------------|-----|---|
| 15                                                  | Electricity          | No  | 0 | 26 | Mobile            | No  | 0 |
|                                                     |                      | Yes | 1 |    |                   | Yes | 1 |
| 16                                                  | Piped water          | No  | 0 | 27 | Radio             | No  | 0 |
|                                                     |                      | Yes | 1 |    |                   | Yes | 1 |
| 17                                                  | Indoor Toilet        | No  | 0 | 28 | TV                | No  | 0 |
|                                                     |                      | Yes | 1 |    |                   | Yes | 1 |
| 18                                                  | Indoor Shower        | No  | 0 | 29 | Computer          | No  | 0 |
|                                                     |                      | Yes | 1 |    |                   | Yes | 1 |
| 19                                                  | Fan                  | No  | 0 | 30 | Generator         | No  | 0 |
|                                                     |                      | Yes | 1 |    |                   | Yes | 1 |
| 20                                                  | Air-conditioning     | No  | 0 | 31 | Refrigerator      | No  | 0 |
|                                                     |                      | Yes | 1 |    |                   | Yes | 1 |
| 21                                                  | Screens              | No  | 0 | 32 | Bicycle           | No  | 0 |
|                                                     |                      | Yes | 1 |    |                   | Yes | 1 |
| 22                                                  | Chickens             | No  | 0 | 33 | Animal drawn Cart | No  | 0 |
|                                                     |                      | Yes | 1 |    |                   | Yes | 1 |
| 23                                                  | Cattle/Ox            | No  | 0 | 34 | Motorcycle        | No  | 0 |
|                                                     |                      | Yes | 1 |    |                   | Yes | 1 |
| 24                                                  | Goats                | No  | 0 | 35 | Car               | No  | 0 |
|                                                     |                      | Yes | 1 |    |                   | Yes | 1 |
| 25                                                  | Other animals: _____ |     |   | 36 | Boat              | No  | 0 |
|                                                     |                      |     |   |    |                   | Yes | 1 |

| <i>LF Knowledge Questions</i> |                                                       |                     |    |
|-------------------------------|-------------------------------------------------------|---------------------|----|
| 37                            | Have you heard about LF before the study?             | No                  | 0  |
|                               |                                                       | Yes                 | 1  |
| 38                            | Have you ever seen LF in your village? (show picture) | No                  | 0  |
|                               |                                                       | Yes                 | 1  |
| 39                            | How is LF Transmitted? (show picture)                 | Walking barefoot    | 01 |
|                               |                                                       | Water/Food          | 02 |
|                               |                                                       | Injury              | 03 |
|                               |                                                       | Sex                 | 04 |
|                               |                                                       | Air-borne           | 05 |
|                               |                                                       | Mosquitos           | 06 |
|                               |                                                       | Skin-Contact        | 07 |
|                               |                                                       | Unclean Environment | 08 |
|                               |                                                       | Poor Hygiene        | 09 |
|                               |                                                       | Witchcraft          | 10 |
|                               |                                                       | Other               | 88 |
|                               |                                                       | Don't know          | 99 |

|        |  |          |         |         |
|--------|--|----------|---------|---------|
| နေ့စွဲ |  | မြို့နယ် | ကျေးရွာ | အိမ်ခြေ |
|        |  |          |         |         |

ကျေးဇူးပြုပြီး မေးခွန်းလေးတွေမသိဘူးဆိုရင် “ ၉ ” လို့ရေးပေးပါ။

|    |                              |                   |   |
|----|------------------------------|-------------------|---|
| 40 | What are the symptoms of LF? |                   |   |
| 41 | How is LF Treated?           | Tablets           | 1 |
|    |                              | Surgery           | 2 |
|    |                              | Physiotherapy     | 3 |
|    |                              | Hygiene Practices | 4 |
|    |                              | Other             | 8 |
|    |                              | Don't Know        | 9 |

| Treatment and Mass Drug Administration Questions |                                                                                                                                                                                                      |     |   |
|--------------------------------------------------|------------------------------------------------------------------------------------------------------------------------------------------------------------------------------------------------------|-----|---|
| 42                                               | Had you heard about the National Programme to Eliminate LF before this study?                                                                                                                        | No  | 0 |
|                                                  |                                                                                                                                                                                                      | Yes | 1 |
| 43                                               | Has your household or village been visited by the LF mass drug administration programme and offered medication?                                                                                      | No  | 0 |
|                                                  |                                                                                                                                                                                                      | Yes | 1 |
| 44                                               | If yes, how many times?                                                                                                                                                                              |     |   |
| 45                                               | How many individuals were living in your household during the time of the last MDA?<br><i>(Including those not eligible, those who do not currently live in the household and those not present)</i> |     |   |
| 46                                               | Have you or your family ever declined to take part in an LF mass drug administration?                                                                                                                | No  | 0 |
|                                                  |                                                                                                                                                                                                      | Yes | 1 |
| 47                                               | If yes, why?                                                                                                                                                                                         |     |   |

အိမ်ခြေ စစ်တမ်းကောက်ယူခြင်း (အိမ်ထောင်ဦးစီးအားမေးရန်) (HH Representative)

**A: အိမ်ခြေအမှတ်အသား**

|                      |                     |                       |                   |                     |
|----------------------|---------------------|-----------------------|-------------------|---------------------|
| နေ့စွဲ (dd/mm/yyyy)  |                     |                       |                   |                     |
| မေးမြန်းသူ (လက်မှတ်) |                     |                       |                   |                     |
|                      | မြို့နယ်            | ကျေးရွာ               | အိမ်ခြေ           | အိမ်ထောင် ဦးစီးအမည် |
| အိမ်ခြေ Details      |                     |                       |                   |                     |
| အိမ်ခြေ CODE         |                     |                       |                   |                     |
|                      | Latitude (00.00000) | Longitude (000.00000) | Elevation (0000m) |                     |
| အိမ်နေရာအနေအထား      |                     |                       |                   |                     |
|                      | နေ့စွဲ (dd/mm/yyyy) | အခြေအနေ               |                   |                     |
| အလည်အပတ်-(၁)         |                     | ၁ ၂ ၃ ၄ ၅ ၆           |                   |                     |
| အလည်အပတ်-(၂)         |                     | ၁ ၂ ၃ ၄ ၅ ၆           |                   |                     |

အခြေအနေ CODE: ၁။ ပြီးစီး ၂။ အိမ်မှာမရှိ ၃။ ယာယီရွှေ့ပြောင်း ၄။ နောက်တခေါက် ထပ်လာရန် ၅။ ငြင်းဆို ၆။ အခြား

**B: မိသားစုစာရင်း**

| လူဦးရေ စုစုပေါင်း                |    |            |      |                          |                          |      |                                      |                            |
|----------------------------------|----|------------|------|--------------------------|--------------------------|------|--------------------------------------|----------------------------|
| ဖြေဆိုသူကို အမှတ်အသားလုပ်ရန် (✓) |    | နာမည် အတို | အသက် | ၁+                       | ၁၅                       | လိင် | အိမ်မှာရှိသူကို အမှတ်အသားလုပ်ရန် (✓) | မနေညက အိမ်မှာ အိပ်သလား (✓) |
|                                  |    |            |      |                          | +                        |      |                                      |                            |
| <input type="checkbox"/>         | ၁  |            |      | <input type="checkbox"/> | <input type="checkbox"/> |      | <input type="checkbox"/>             | <input type="checkbox"/>   |
| <input type="checkbox"/>         | ၂  |            |      | <input type="checkbox"/> | <input type="checkbox"/> |      | <input type="checkbox"/>             | <input type="checkbox"/>   |
| <input type="checkbox"/>         | ၃  |            |      | <input type="checkbox"/> | <input type="checkbox"/> |      | <input type="checkbox"/>             | <input type="checkbox"/>   |
| <input type="checkbox"/>         | ၄  |            |      | <input type="checkbox"/> | <input type="checkbox"/> |      | <input type="checkbox"/>             | <input type="checkbox"/>   |
| <input type="checkbox"/>         | ၅  |            |      | <input type="checkbox"/> | <input type="checkbox"/> |      | <input type="checkbox"/>             | <input type="checkbox"/>   |
| <input type="checkbox"/>         | ၆  |            |      | <input type="checkbox"/> | <input type="checkbox"/> |      | <input type="checkbox"/>             | <input type="checkbox"/>   |
| <input type="checkbox"/>         | ၇  |            |      | <input type="checkbox"/> | <input type="checkbox"/> |      | <input type="checkbox"/>             | <input type="checkbox"/>   |
| <input type="checkbox"/>         | ၈  |            |      | <input type="checkbox"/> | <input type="checkbox"/> |      | <input type="checkbox"/>             | <input type="checkbox"/>   |
| <input type="checkbox"/>         | ၉  |            |      | <input type="checkbox"/> | <input type="checkbox"/> |      | <input type="checkbox"/>             | <input type="checkbox"/>   |
| <input type="checkbox"/>         | ၁၀ |            |      | <input type="checkbox"/> | <input type="checkbox"/> |      | <input type="checkbox"/>             | <input type="checkbox"/>   |

|        |  |          |         |         |
|--------|--|----------|---------|---------|
| နေ့စွဲ |  | မြို့နယ် | ကျေးရွာ | အိမ်ခြေ |
|        |  |          |         |         |

ကျေးဇူးပြုပြီး မေးခွန်းလေးတွေမသိဘူးဆိုရင် “ ၉ ” လို့ရေးပေးပါ။

**C: HOUSEHOLD QUESTIONNAIRE**

| Demographics |                                                             |                                                                       |                  |                       |                                                                          |                                                              |                  |
|--------------|-------------------------------------------------------------|-----------------------------------------------------------------------|------------------|-----------------------|--------------------------------------------------------------------------|--------------------------------------------------------------|------------------|
| ၁            | လူမျိုး<br>(Ethnicity)                                      | အခြား: _____                                                          | ၁<br>၂<br>၃<br>၄ | ၅<br>၆<br>၇<br>၈<br>၉ | ပြေဆိုအတန်း<br>(Respondent Schooling)                                    | ကျောင်းမနေဖူးပါ<br>မူလတန်း<br>အလယ်တန်း၊အထက်တန်း<br>တက္ကသိုလ် | ၁<br>၂<br>၃<br>၄ |
| ၂            | ကိုးကွယ်သည့်ဘာသာ<br>(Religion)                              | Buddhist<br>အခြား: _____                                              | ၁<br>၂<br>၃<br>၄ | ၅<br>၆<br>၇<br>၈<br>၉ | အိမ်သားများ၏အမြင့်ဆုံးအတန်း<br>(Highest Schooling in Household)          | ကျောင်းမနေဖူးပါ<br>မူလတန်း<br>အလယ်တန်း၊အထက်တန်း<br>တက္ကသိုလ် | ၁<br>၂<br>၃<br>၄ |
| ၃            | စာဖတ်တတ်မတတ်<br>(အောက်မှစာကို<br>ဖတ် ခိုင်းရန်)<br>Literacy | စာမတတ်<br>တလုံးနှစ်လုံးဖတ်တတ်၊<br>ဖတ်တတ်စာမတတ်<br>တခြားဘာသာစကားတတ်လား | ၁<br>၂<br>၃<br>၄ | ၅<br>၆<br>၇<br>၈<br>၉ | မိသားစုအားလုံးပေါင်း၏တစ်လပျမ်းမျှဝင်ငွေ<br>(Monthly Income of household) |                                                              |                  |

| Physical Household Details |                                                            |                                                                                                       |                  |                       |                                                                                                                              |                                                     |                                                        |                  |
|----------------------------|------------------------------------------------------------|-------------------------------------------------------------------------------------------------------|------------------|-----------------------|------------------------------------------------------------------------------------------------------------------------------|-----------------------------------------------------|--------------------------------------------------------|------------------|
| ၇                          | အမိုး<br>(Roof Material)                                   | သက်ကယ်<br>သွပ်<br>အုတ်ကြွပ်<br>အခြား: _____                                                           | ၁<br>၂<br>၃<br>၄ | ၅<br>၆<br>၇<br>၈<br>၉ | ခြင်မဝင်အောင်ပြတင်းပေါက်တွေကို<br>တစ်ခုခု နဲ့ကာထားသလား (ခြင်ကာ၊ မှန်၊<br>သစ်သားပြတင်းကာ)<br>(Screens/ Glass on most windows) | မရှိ<br>ရှိ                                         | ၁<br>၂                                                 |                  |
| ၈                          | နံရံ<br>(Wall Material)                                    | ဝါးထရံ<br>သစ်သား<br>အုတ်အင်္ဂံတေ / ဘိလပ်မြေ/ အင်္ဂံတေ<br>အခြား: _____                                 | ၁<br>၂<br>၃<br>၄ | ၅<br>၆<br>၇<br>၈<br>၉ | ခြင်ထောင် ဘယ်နှစ်လုံးရှိသလဲ<br>(Number of bed-nets in the house?)                                                            |                                                     |                                                        |                  |
| ၉                          | ကြမ်းခင်း<br>(Floor Material)                              | None<br>သစ်သား<br>ကြွေပြား / ဘိလပ်မြေ/ အင်္ဂံတေ<br>/ အရောင်တင်သစ်သား/<br>သပ်သပ်ရပ်ရပ်<br>အခြား: _____ | ၁<br>၂<br>၃<br>၄ | ၅<br>၆<br>၇<br>၈<br>၉ | Toilet Type                                                                                                                  | Open-defecation<br>Unimproved<br>Shared<br>Improved | ၁<br>၂<br>၃<br>၄                                       |                  |
| ၁၀                         | အခန်းဘယ်နှစ်ခန်း ရှိသလဲ<br>(Number of rooms in the house?) |                                                                                                       |                  |                       | ၁၅                                                                                                                           | Water Type                                          | Surface<br>Unimproved<br>Other Improved<br>Piped Water | ၁<br>၂<br>၃<br>၄ |

**ကျောင်းနေအရွယ် ကလေးတိုင်း ကျောင်းသွားရမယ်။**

|        |  |          |         |         |  |
|--------|--|----------|---------|---------|--|
| နေ့စွဲ |  | မြို့နယ် | ကျေးရွာ | အိမ်ခြေ |  |
|        |  |          |         |         |  |

ကျေးဇူးပြုပြီး မေးခွန်းလေးတွေမသိဘူးဆိုရင် “ ၉ ” လို့ရေးပေးပါ။

**Principal Components Analysis Asset register**

|    |                                                   |           |    |                                        |           |
|----|---------------------------------------------------|-----------|----|----------------------------------------|-----------|
| ၁၅ | လျှပ်စစ်မီး<br>(Electricity)                      | မရှိ<br>၀ | ၂၆ | မိုဘိုင်းဖုန်း<br>(Mobile)             | မရှိ<br>၀ |
| ၁၆ | အိမ်နှင့်တွဲလျက်အိမ်သာ<br>(Indoor Toilet)         | မရှိ<br>၀ | ၂၇ | ရေဒီယို<br>(Radio)                     | မရှိ<br>၀ |
| ၁၇ | ရုပ်မြင်သံကြားစက်<br>(TV)                         | မရှိ<br>၀ | ၂၈ | လေအေးပေးစက်<br>(Air conditioning)      | မရှိ<br>၀ |
| ၁၈ | အိမ်တွင်းရေချိုးခန်း<br>(Indoor Shower)           | မရှိ<br>၀ | ၂၉ | Computer                               | မရှိ<br>၀ |
| ၁၉ | မျက်နှာကျက်ပန်ကာ<br>(Fan)                         | မရှိ<br>၀ | ၃၀ | Generator                              | မရှိ<br>၀ |
| ၂၀ | ခြင်စကာပြတင်းပေါက်အားလုံး<br>(Screens on windows) | မရှိ<br>၀ | ၃၁ | ရေခဲသေတာ<br>(Refrigerator)             | မရှိ<br>၀ |
| ၂၁ | စက်ဘီး<br>(Bicycle)                               | မရှိ<br>၀ | ၃၂ | ပိုက်လိုင်းရေပေးဝေမှု<br>(Piped water) | မရှိ<br>၀ |
| ၂၂ | ကြက်<br>(Chickens)                                | မရှိ<br>၀ | ၃၃ | နွားလှည်း<br>(Animal drawn Cart)       | မရှိ<br>၀ |
| ၂၃ | နွား ဣ<br>(Cattle/Ox)                             | မရှိ<br>၀ | ၃၄ | မော်တော်ဆိုင်ကယ်<br>(Motorcycle)       | မရှိ<br>၀ |
| ၂၄ | ဆိတ်<br>(Goats)                                   | မရှိ<br>၀ | ၃၅ | ကား<br>(Car)                           | မရှိ<br>၀ |
| ၂၅ | အခြားတိရစ္ဆာန်                                    |           | ၃၆ | လှေ<br>(Boat)                          | မရှိ<br>၀ |

**LF Knowledge Questions**

|    |                                                                                                                         |           |
|----|-------------------------------------------------------------------------------------------------------------------------|-----------|
| ၃၇ | အရင်ကဆင်ခြေထောက်ရောဂါအကြောင်းကြားဖူးပါသလား<br>(Have you heard about LF before the study?)                               | မရှိ<br>၀ |
| ၃၈ | သင်နေထိုင်ရာကျေးရွာတွင် ဆင်ခြေထောက်ရောဂါဖြစ်နေသူတွေဖူးပါသလား<br>(Have you ever seen LF in your village? (show picture)) | မရှိ<br>၀ |

|            |                                                                |                                |    |
|------------|----------------------------------------------------------------|--------------------------------|----|
| ၃၉         | ဆင်ခြေထောက်ရောဂါကဘယ်လိုကူးစက်ပါသလဲ<br>(How is LF Transmitted?) | ဖိနပ်မပါဘဲလမ်းလျှောက်လို့      | ၀၁ |
|            |                                                                | အစားမှားလို့ကူးတာ/ရေကကူးတာ     | ၀၂ |
|            |                                                                | ထိခိုက်မိလို့                  | ၀၃ |
|            |                                                                | လိင်မှတဆင့်ကူးဆက်              | ၀၄ |
|            |                                                                | လေထဲကကူးတာ                     | ၀၅ |
|            |                                                                | ခြင်ကိုက်လို့                  | ၀၆ |
|            |                                                                | အရေပြားထိတွေ့မှုမှတဆင့် ကူးစက် | ၀၇ |
|            |                                                                | ပတ်ဝန်းကျင်မသန့်လို့           | ၀၈ |
|            |                                                                | တကိုယ်ရေသန့်ရှင်းမှု မရှိ      | ၀၉ |
|            |                                                                | စုန်းပြုစားလို့                | ၁၀ |
| အခြား_____ | ၈၈                                                             |                                |    |
| မသိပါ      | ၉၉                                                             |                                |    |

|        |  |          |         |         |  |
|--------|--|----------|---------|---------|--|
| နေ့စွဲ |  | မြို့နယ် | ကျေးရွာ | အိမ်ခြေ |  |
|        |  |          |         |         |  |

ကျေးဇူးပြုပြီး မေးခွန်းလေးတွေမသိဘူးဆိုရင် “ ၉ ” လို့ရေးပေးပါ။

|    |                                                          |                                                                                                      |
|----|----------------------------------------------------------|------------------------------------------------------------------------------------------------------|
| ၄၀ | ဆင်ခြေထောက်ရောဂါလက္ခဏာများ<br>(Symptoms of LF?)          |                                                                                                      |
| ၄၁ | ဆင်ခြေထောက်ရောဂါကိုဘယ်လိုကုရသလဲ။<br>(How is LF Treated?) | ဆေးပြားသောက် ၁<br>ခွဲစိတ် ၂<br>လေ့ကျင့်ခန်းလုပ် ၃<br>တစ်ကိုယ်ရည်သန့်ရှင်းရေး ၄<br>အခြား ၈<br>မသိပါ ၉ |

| လူအားလုံးဆေးကျွေးခြင်းနှင့် ဆေးကုသမှု |                                                                                                                                                                    |      |   |
|---------------------------------------|--------------------------------------------------------------------------------------------------------------------------------------------------------------------|------|---|
| ၄၂                                    | ဆင်ခြေထောက်ရောဂါကင်းဝေးရေး စီမံချက်ကို အရင်ကကြားဖူးသလား<br>(Had you heard about the National Programme to Eliminate LF before this study?)                         | မရှိ | ၀ |
|                                       |                                                                                                                                                                    | ရှိ  | ၁ |
| ၄၃                                    | သင်တို့နေထိုင်ရာရပ်ရွာကို ဆင်ခြေထောက်ရောဂါကာကွယ်ဆေး ကွင်းဆင်းတိုက်ကျွေးပေးသောအဖွဲ့ ရှိလား။<br>(Household/Village visited by the LF MDA and offered medication?)    | မရှိ | ၀ |
|                                       |                                                                                                                                                                    | ရှိ  | ၁ |
| ၄၄                                    | ရှိရင်ဘယ်နှစ်ကြိမ်လာသလဲ။                                                                                                                                           |      |   |
| ၄၅                                    | ဆေးလာတိုက်တဲ့အချိန် အိမ်မှာလူဘယ်နှစ်ယောက်ရှိလဲ<br>(How many individuals living in household during last MDA?)                                                      |      |   |
| ၄၆                                    | လူအားလုံးဆေးကျွေးစဉ်က သင့်နှင့် သင့်မိသားစု ဆေးသောက်ရန်ငြင်းဆိုဖူးသလား။<br>(Have you or your family ever declined to take part in an LF mass drug administration?) | မရှိ | ၀ |
|                                       |                                                                                                                                                                    | ရှိ  | ၁ |
| ၄၇                                    | ငြင်းဖူးတယ်ဆိုရင် ဘာကြောင့်လဲ။<br>(If yes, Why?)                                                                                                                   |      |   |
